# Supplementary material
Source: PubMed Central journal article supplement (PMC3700694)
Supplement: CJN.09460912_CJN09460912SupplementaryData.pdf [file CJN.09460912_CJN09460912SupplementaryData.pdf]

**A.**

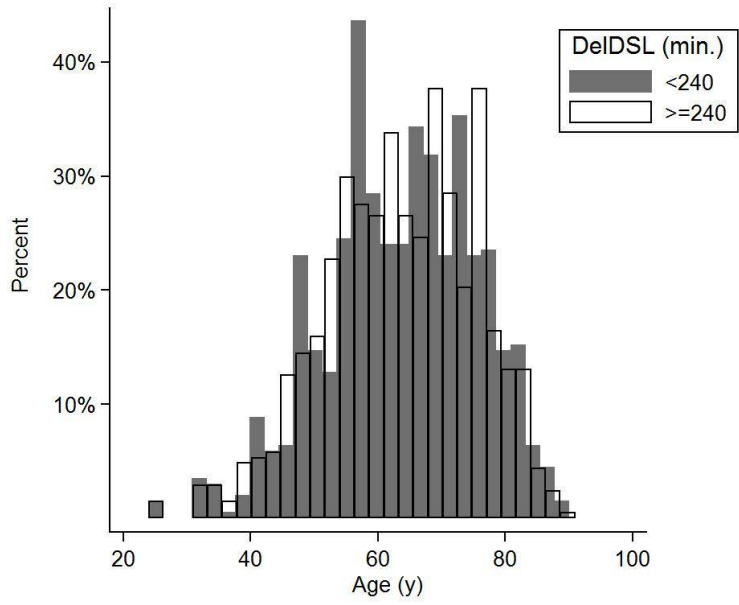

**B.**

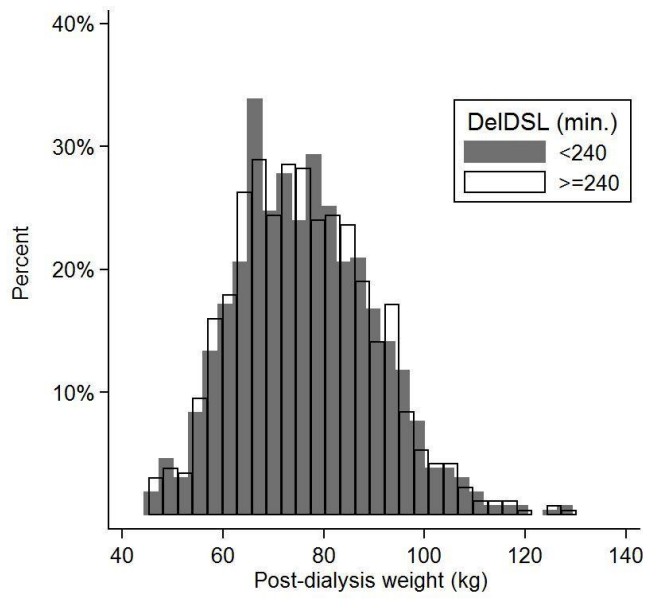

C.

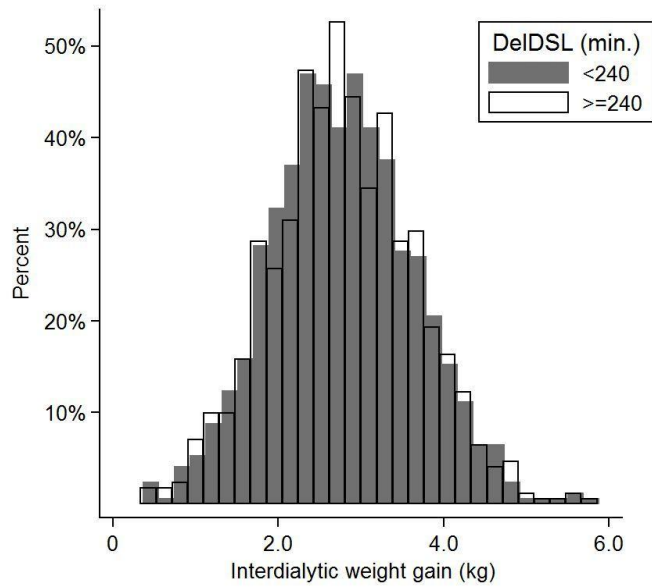

**Supplemental Figure 1.** Distribution of age (panel A), post-dialysis weight (panel B), and interdialytic weight gain (panel C) across DeIDSL groups in the matched analytical cohort used in DeIDSL--mortality analyses.

A.

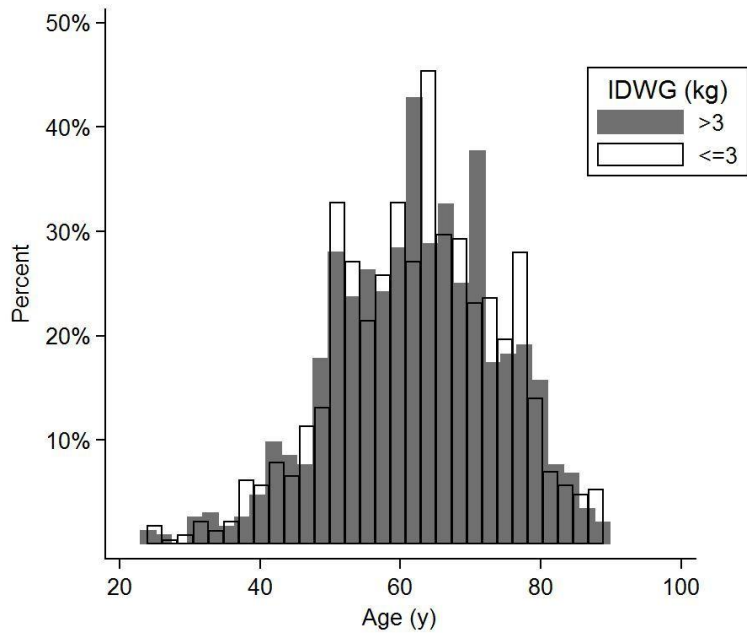

B.

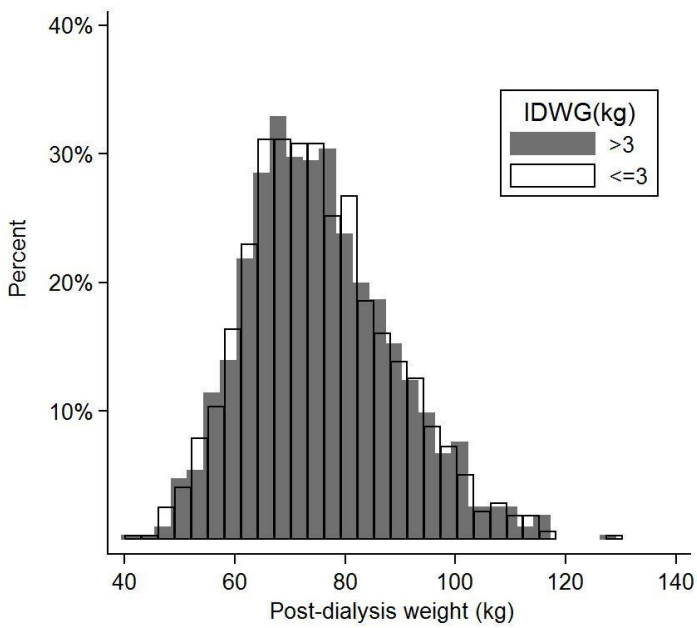

**Supplemental Figure 2.** Distribution of age (panel A) and post-dialysis weight (panel B) across IDWG groups in the matched analytical cohort used in the primary IDWG--mortality analyses.
